# Supplementary material for: Tumor-specific CD4 T cells instruct monocyte fate in pancreatic ductal adenocarcinoma
Source: PubMed Central journal article supplement — Cell Rep. Author manuscript; Available in PMC 2023 Aug 24. (PMC10448358; doi:10.1016/j.celrep.2023.112732), 2023-07-03
Supplement: NIHMS1920485-supplement-1.pdf [file NIHMS1920485-supplement-1.pdf]

**Cell Reports, Volume 42**

**Supplemental information**

**Tumor-specific CD4 T cells instruct monocyte fate  
in pancreatic ductal adenocarcinoma**

**Michael T. Patterson, Adam L. Burrack, Yingzheng Xu, Grant H. Hickok, Zoe C. Schmiechen, Samuel Becker, Eduardo Cruz-Hinojoza, Patricia R. Schrank, Ainsley E. Kennedy, Maria M. Firulyova, Ebony A. Miller, Konstantin Zaitsev, Jesse W. Williams, and Ingunn M. Stromnes**

## Supplemental Figure 1

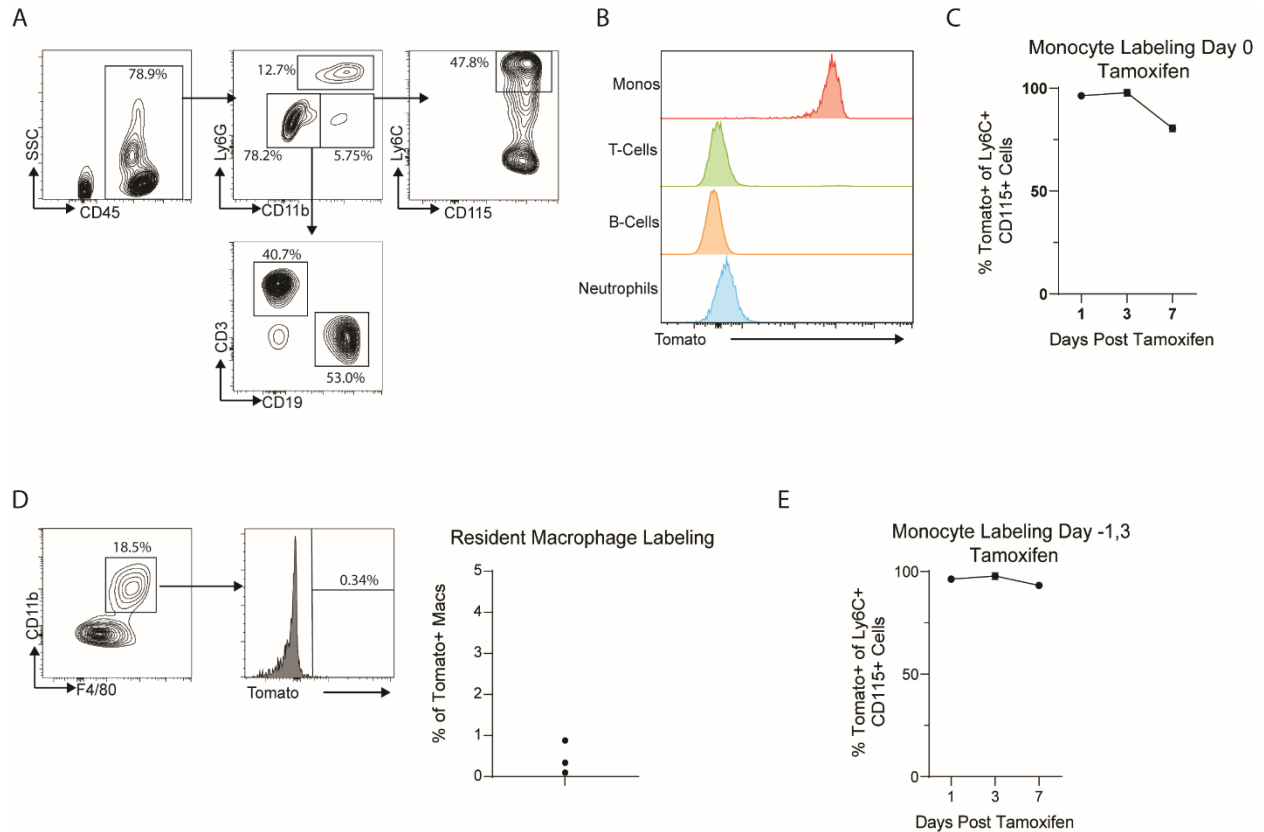

### Supplemental Figure 1. Labeling efficiency of monocytes in $CCR2^{CreER} R26^{TdTomato}$ fate mapping mice. Related to Figure 1.

**A)** Gating strategy for analysis of circulating immune cells from tumor bearing  $CCR2^{CreER} R26^{TdTomato}$  mice 1 day post tamoxifen administration.

**B)** Tomato reporter expression by circulating immune subsets from tumor bearing  $CCR2^{CreER} R26^{TdTomato}$  mice 1 day post tamoxifen administration.

**C)** Proportion of circulating Tomato+ monocytes from tumor bearing  $CCR2^{CreER} R26^{TdTomato}$  mice treated with tamoxifen on the day of tumor implantation (Day 0, n=4 mice per group). Data are mean  $\pm$  S.E.M.

**D)** Labeling and quantification of pancreatic resident (Tomato-) macrophages from non-tumor bearing  $CCR2^{CreER} R26^{TdTomato}$  1 day post tamoxifen administration. CD11b+F480+ macrophages were gated on live, CD45+Ly6G- cells.

**E)** Proportion of circulating monocytes that are Tomato+ from tumor bearing  $CCR2^{CreER} R26^{TdTomato}$  treated with tamoxifen 1 day prior to tumor implantation (Day -1) and on day 3 after tumor implantation (n=4 mice per timepoint).

## Supplemental Figure 2

A

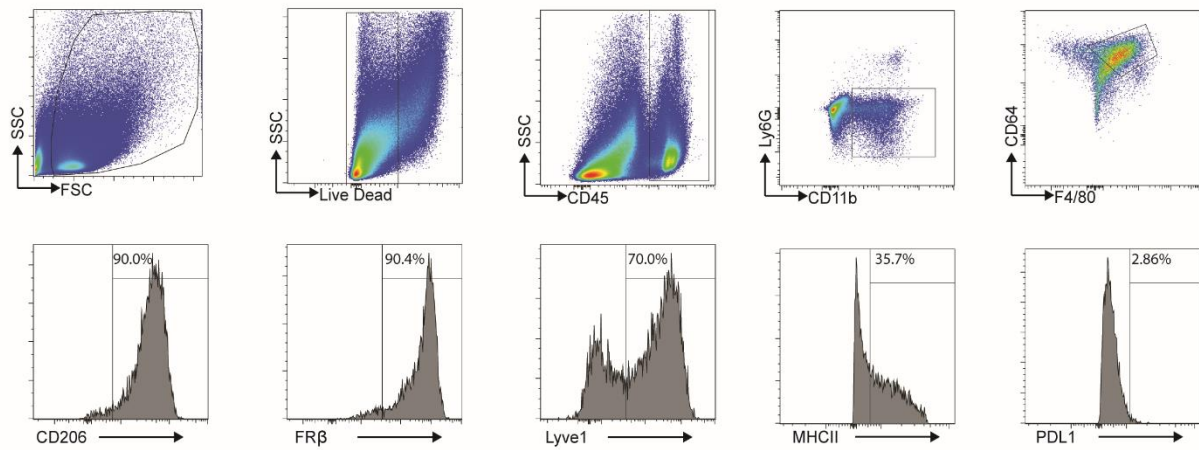

B

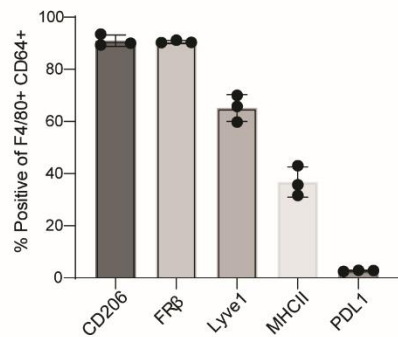

### Supplemental Figure 2. Phenotyping of steady state pancreatic resident macrophages. Related to Figure 1M-O.

**A)** Gating strategy for analysis of pancreatic macrophages from untreated non-tumor bearing CCR2<sup>CreER</sup> R26<sup>TdTomato</sup> mice. Live cells are gated off single cells.

**B)** Proportion of CD64<sup>+</sup>F4/80<sup>+</sup> pancreatic macrophages that express the indicated marker (n=3). Each dot is an independent mouse. Data are mean ± S.E.M.

### Supplemental Figure 3

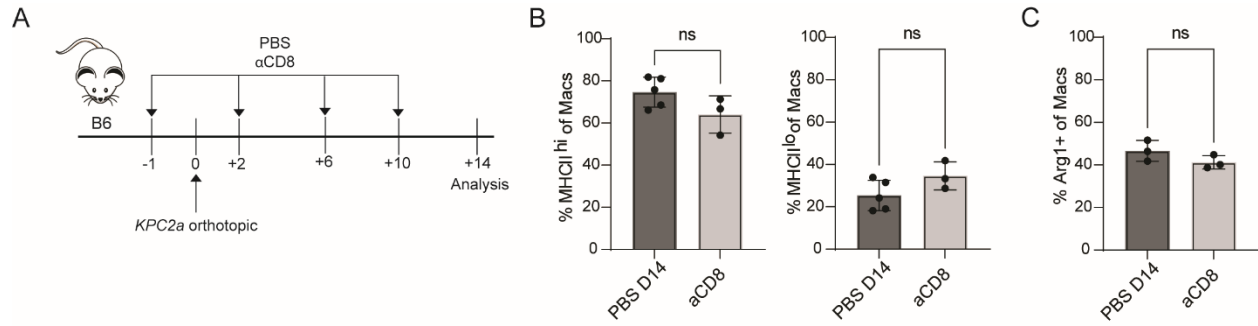

### Supplemental Figure 3. Prolonged CD8 T cell depletion does not change macrophage phenotype. Related to Figure 2 A-K.

**A)** Schematic for testing the impact of CD8 T cells on macrophage phenotype.

**B)** MHCII<sup>hi</sup> or MHCII<sup>lo</sup> macrophage frequency from tumors isolated from PBS or αCD8 treated mice at 14 days after tumor implantation (n=3-4 mice per group). Populations are gated on CD64<sup>+</sup> F4/80<sup>+</sup> cells. Each dot is an independent mouse. Data are mean ± S.E.M.

**C)** Arg1<sup>+</sup> macrophage frequency from tumors isolated from PBS or αCD8 treated mice at 14 days after tumor implantation (n=3-4 mice per group). Populations are gated on CD64<sup>+</sup> F4/80<sup>+</sup> cells. Each dot is an independent mouse. Data are mean ± S.E.M.

## Supplemental Figure 4

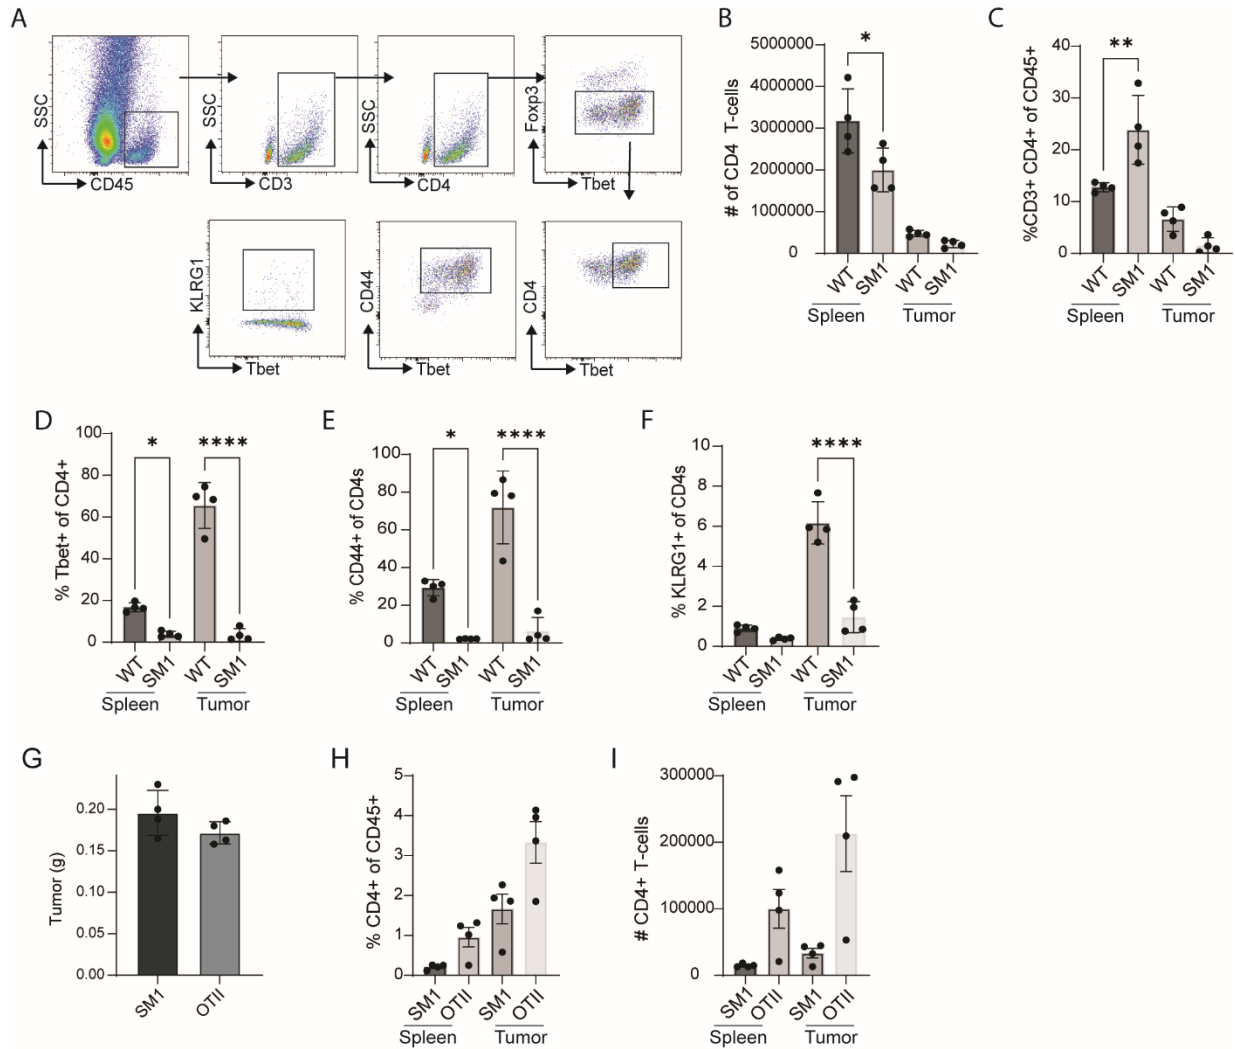

### Supplemental Figure 4. Impact of tumor antigen specificity on intratumoral CD4 T cell quantity and phenotype. Related to Figure 2L-T.

**A)** Gating strategy for CD4 T cells on day 7 post orthotopic tumor implantation. Representative plots are from WT mouse at day 7 post tumor and gated on live, single cells.

**B-C)** CD4+T cell number (B) or frequency (C) from WT or SM1 *Rag1*<sup>-/-</sup> mice at day 7 post tumor implantation (n=4 per group). Each dot is an independent mouse. Data are mean ± S.E.M. \**p*<0.05, Student's t-test for each tissue.

**D-F)** Proportion of CD4+Foxp3<sup>-</sup> (Tcons) T cells that express Tbet (D), CD44<sup>+</sup>, or KLRG1 (F) in WT or SM1 *Rag1*<sup>-/-</sup> mice at day 7 post tumor implantation (n=4 per group). Each dot is an independent mouse. Data are mean ± S.E.M. \**p*<0.05, \*\**p*<0.005, \*\*\*\**p*<0.0001, Student's t-test for each tissue.

**G)** Tumor weight in grams from Figure 2Q. Data are mean ± S.E.M. n=4 mice per group.

**H-I)** CD4+T cell number or frequency from KPC-OVA tumor bearing recipients of SM1 *Rag1*<sup>-/-</sup> or OTII CD4 T cells at day 7 post tumor implantation (n=4 per group). Each dot is an independent mouse. Data are mean ± S.E.M. \**p*<0.05, Student's t-test for each tissue.

## Supplemental Figure 5

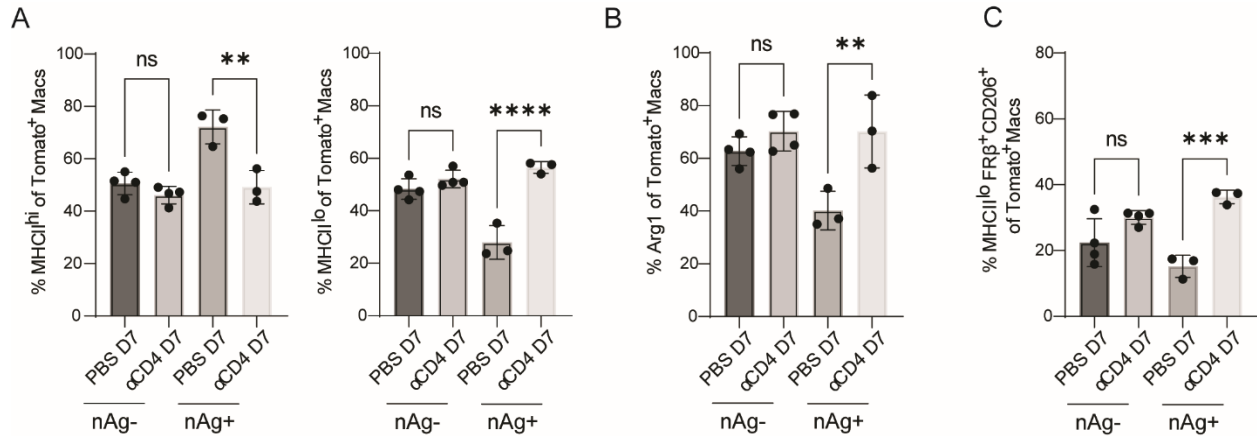

### Supplemental Figure 5. Impact of tumor neoantigen expression on macrophage phenotype. Related to Figure 2.

**A)** Intratumoral MHCII<sup>hi</sup> or MHCII<sup>lo</sup> macrophage frequency from tamoxifen treated CCR2<sup>CreER</sup> R26<sup>tdTomato</sup> mice bearing CB neoantigen expressing (nAg+) or CB negative (nAg-) tumors 7 days after implantation (n=3-4 mice per group). CD4 T cell depletion was performed as in Figure 2. Populations are gated on CD64+ F4/80+ cells. Each dot is an independent mouse. Data are mean ± S.E.M.

**B)** Arg1+ macrophage frequency from tumors isolated from nAg+ and nAg- tumors 7 days after implantation (n=3-4 mice per group). Populations are gated on CD64+ F4/80+ cells. Each dot is an independent mouse. Data are mean ± S.E.M.

**C)** Intratumoral MHCII<sup>lo</sup> CD206+ FRβ+ macrophage frequency from mice in A. Populations are gated on CD64+ F4/80+ cells. Data are mean ± S.E.M.

## Supplemental Figure 6

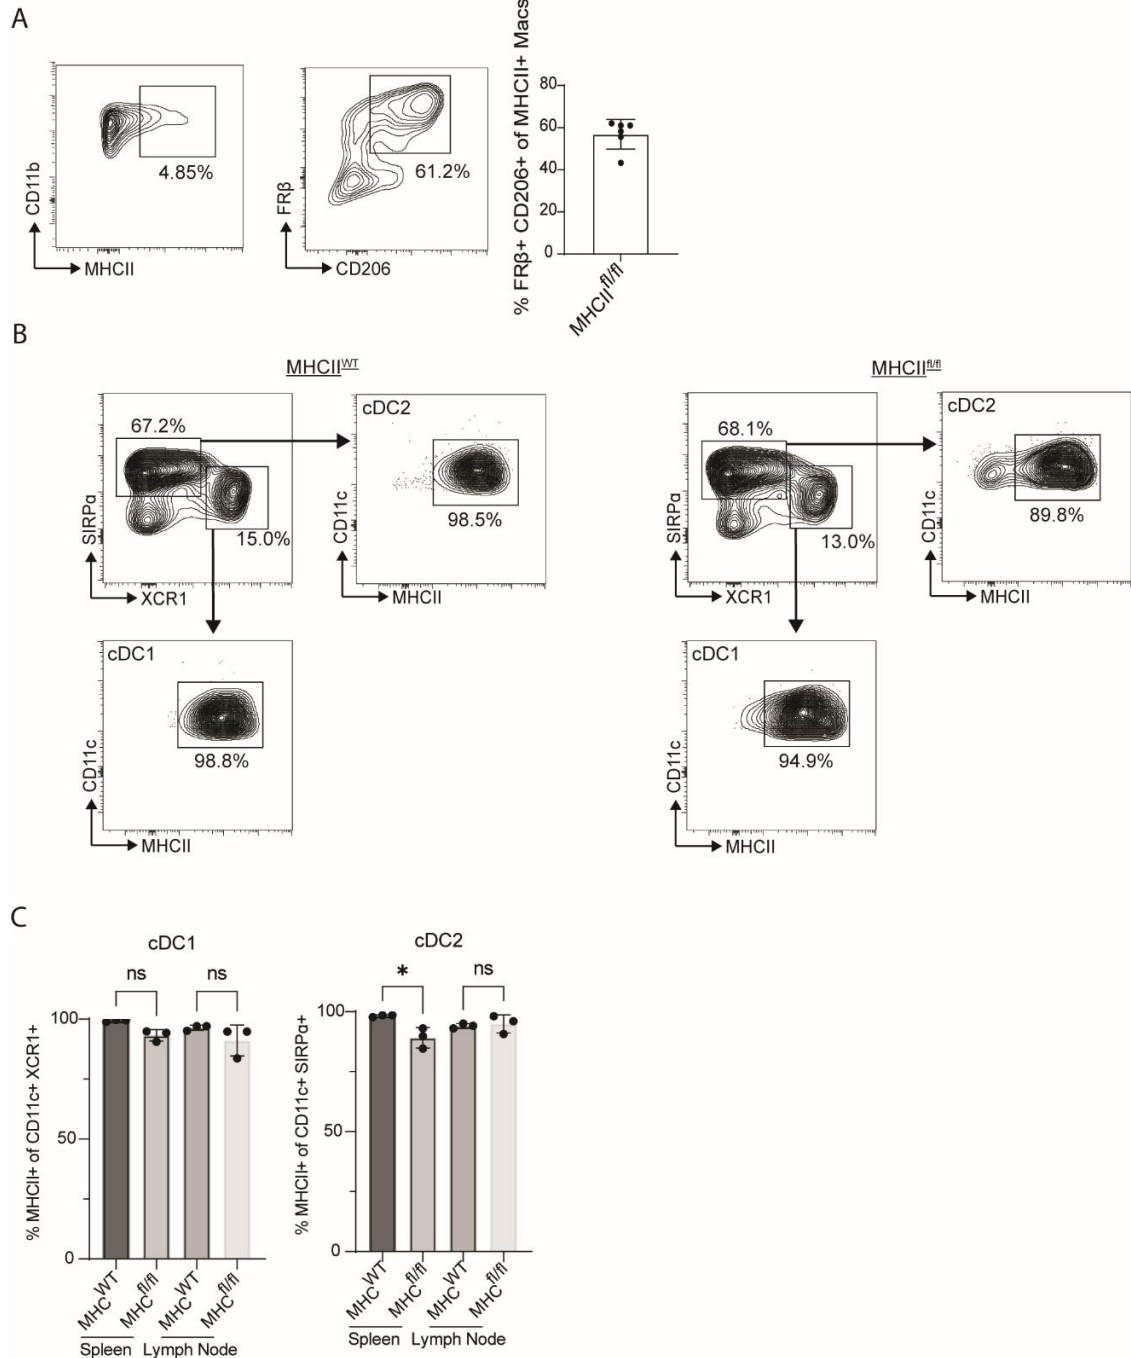

### Supplemental Figure 6. MHCII is retained on tissue resident macrophages and dendritic cells from $CCR2^{CreER}$ $MHCII^{flx/flx}$ tumor bearing mice. Related to Figure 3.

**A)** Phenotype of remaining intratumoral  $MHCII^{hi}$  macrophages from  $CCR2^{CreER}$   $MHCII^{flx/flx}$  tumor bearing mice treated with tamoxifen as in Figure 3 (n=6 mice). Data are mean  $\pm$  S.E.M.

**B)** Gating of splenic and lymph node DC subsets from  $CCR2^{CreER}$   $MHCII^{flx/flx}$  and  $MHCII^{WT}$  mice treated with 2 doses of tamoxifen on days 0 and 4 and analyzed on day 5 (n=3 mice per group).

**C)** Proportion of cDC1 and cDC2 cells that express MHCII from mice in B. Data are mean  $\pm$  S.E.M.

## Supplemental Figure 7

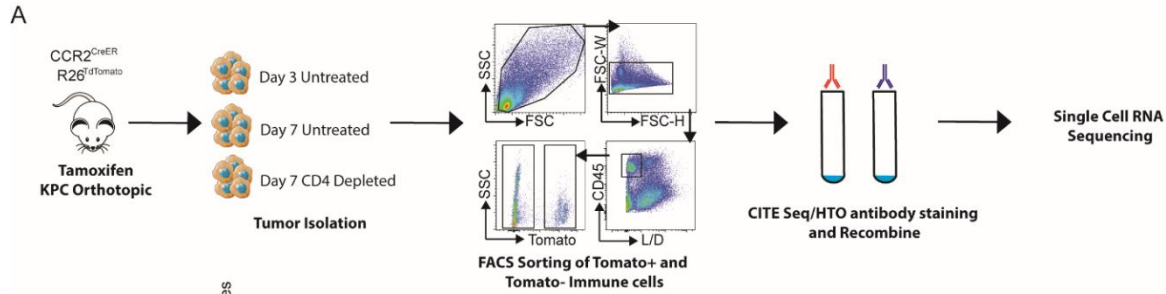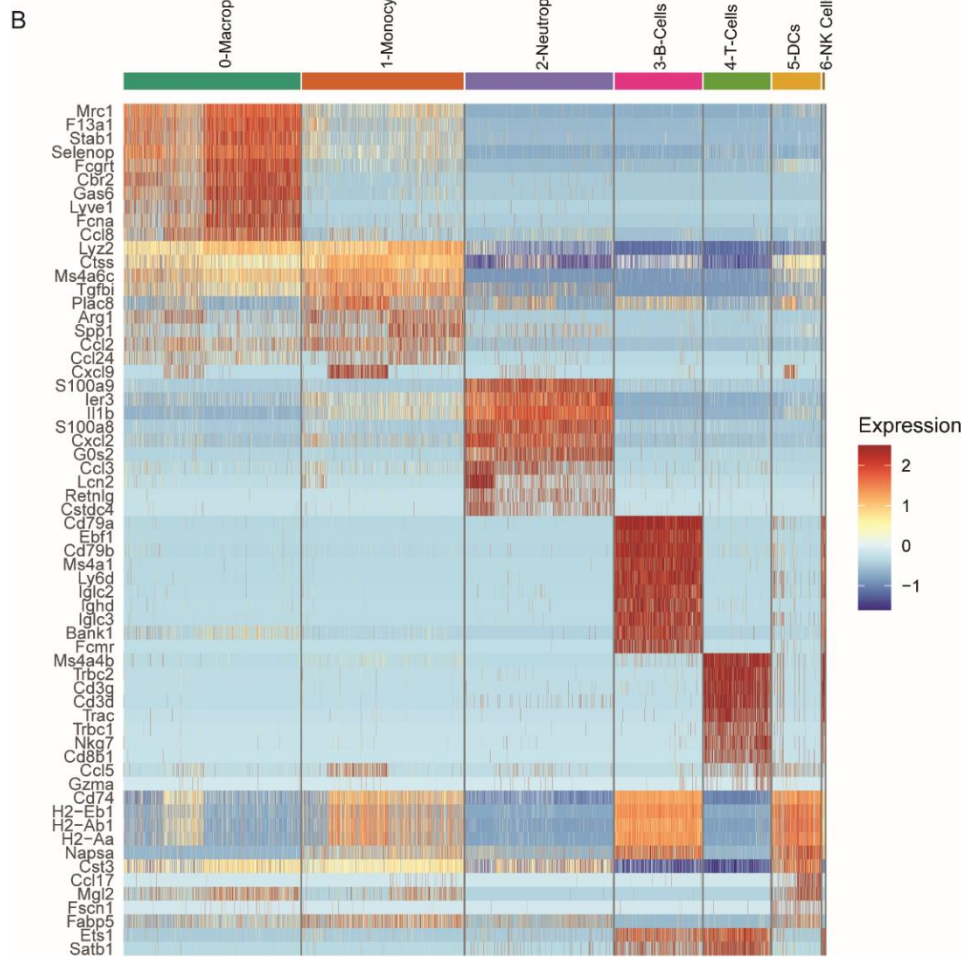

**Supplemental Figure 7. scRNAseq analysis of immune cells in monocyte-fate mapping tumor-bearing mice. Related to Figure 4.**

**A)** Experimental approach for scRNAseq analysis. CCR2<sup>CreER</sup> R26<sup>TdTomato</sup> mice were orthotopically implanted with *KPC2a* tumors. One cohort was treated with anti-CD4 at day -1 and day +2. All cohorts were administered tamoxifen on the day of tumor implantation. Tumors were isolated from a total of 4 mice per cohort per timepoint. Tumors from mice treated with anti-CD4 were harvested on day 7. Intratumoral Tomato+ and Tomato- cells were FACS sorted, labeled with CITE-Seq antibodies, hash tagged and pooled at a 1:1 mixture for scRNAseq.

**B)** Heatmap showing top 5 differentially expressed genes for each cluster. singleR was used to name cell populations based on top differentially expressed genes.



## Supplemental Figure 8

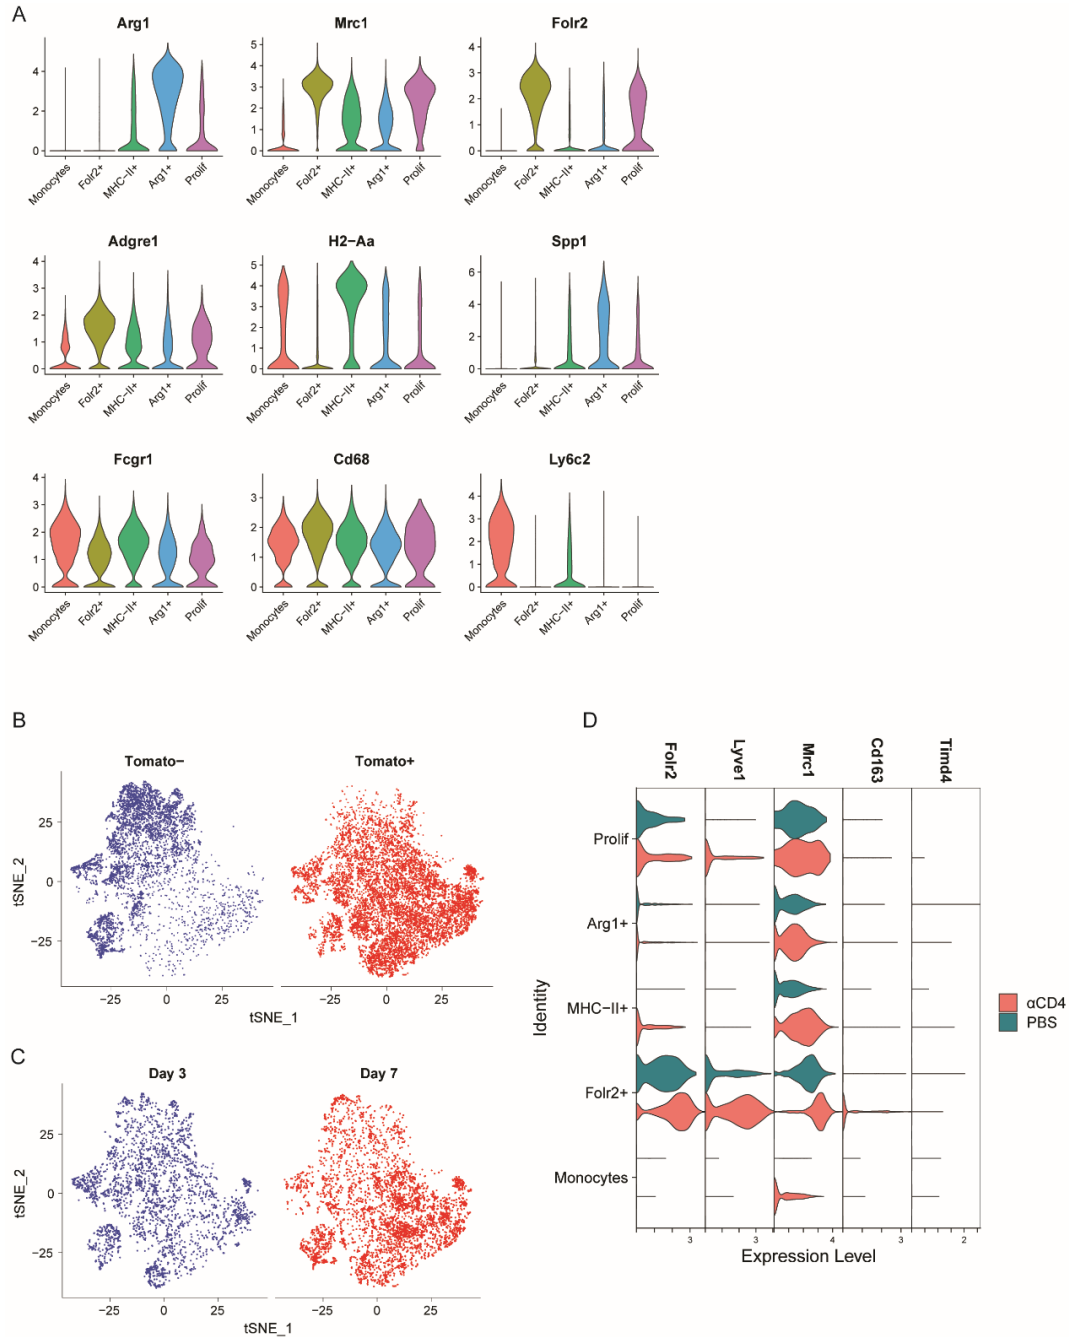

### Supplemental Figure 8. Monocyte/macrophage gene changes following CD4 T cell depletion. Related to Figure 4 and Figure 5.

- A)** Violin plots of selected cluster defining genes from scRNAseq data.
- B)** tSNE plots of Tomato+ and Tomato- cells from PBS control mice merged from days 3 and 7.
- C)** tSNE plots of monocyte/macrophage clusters from PBS control mice merged from days 3 and 7.
- D)** Violin plots of selected genes associated with a tissue resident phenotype.

## Supplemental Figure 9

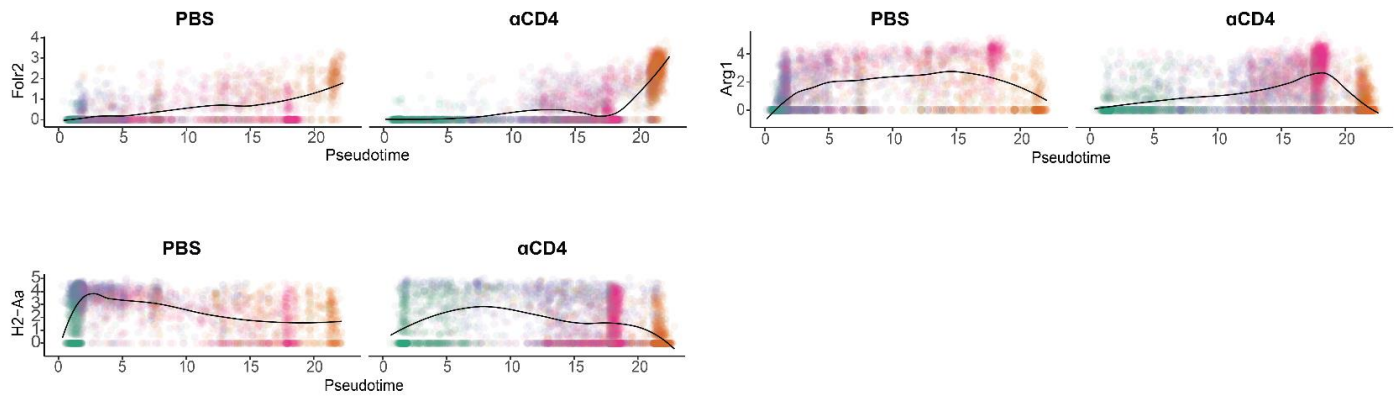

**Supplemental Figure 9. Kinetic analysis of cluster defining genes. Related to Figure 5.** Kinetic analysis of cluster defining gene expression over pseudotime. Folr2 defines Folr2+ cluster, MHCII defines MHCII+ cluster and Arg1 defines Arg1+ cluster.

**Supplemental Figure 10**

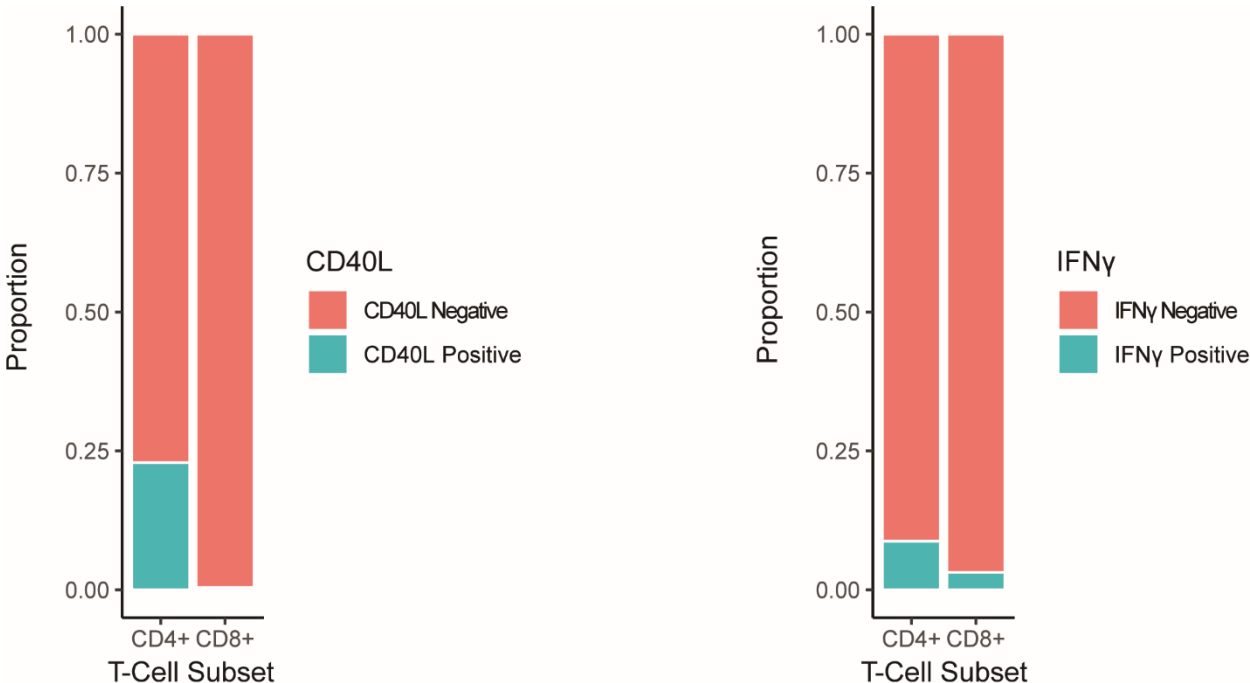

**Supplemental Figure 10. Intratumoral CD4 and CD8 T cell *Ifng* or *Cd40l* expression from Day 7 scRNAseq data. Related to Figure 6.** Proportion of CD4 and CD8 T cells that express *Ifng* or *Cd40l* was determined by scRNAseq analysis of intratumoral T cell clusters from day 7 tumors.

## Supplemental Figure 11

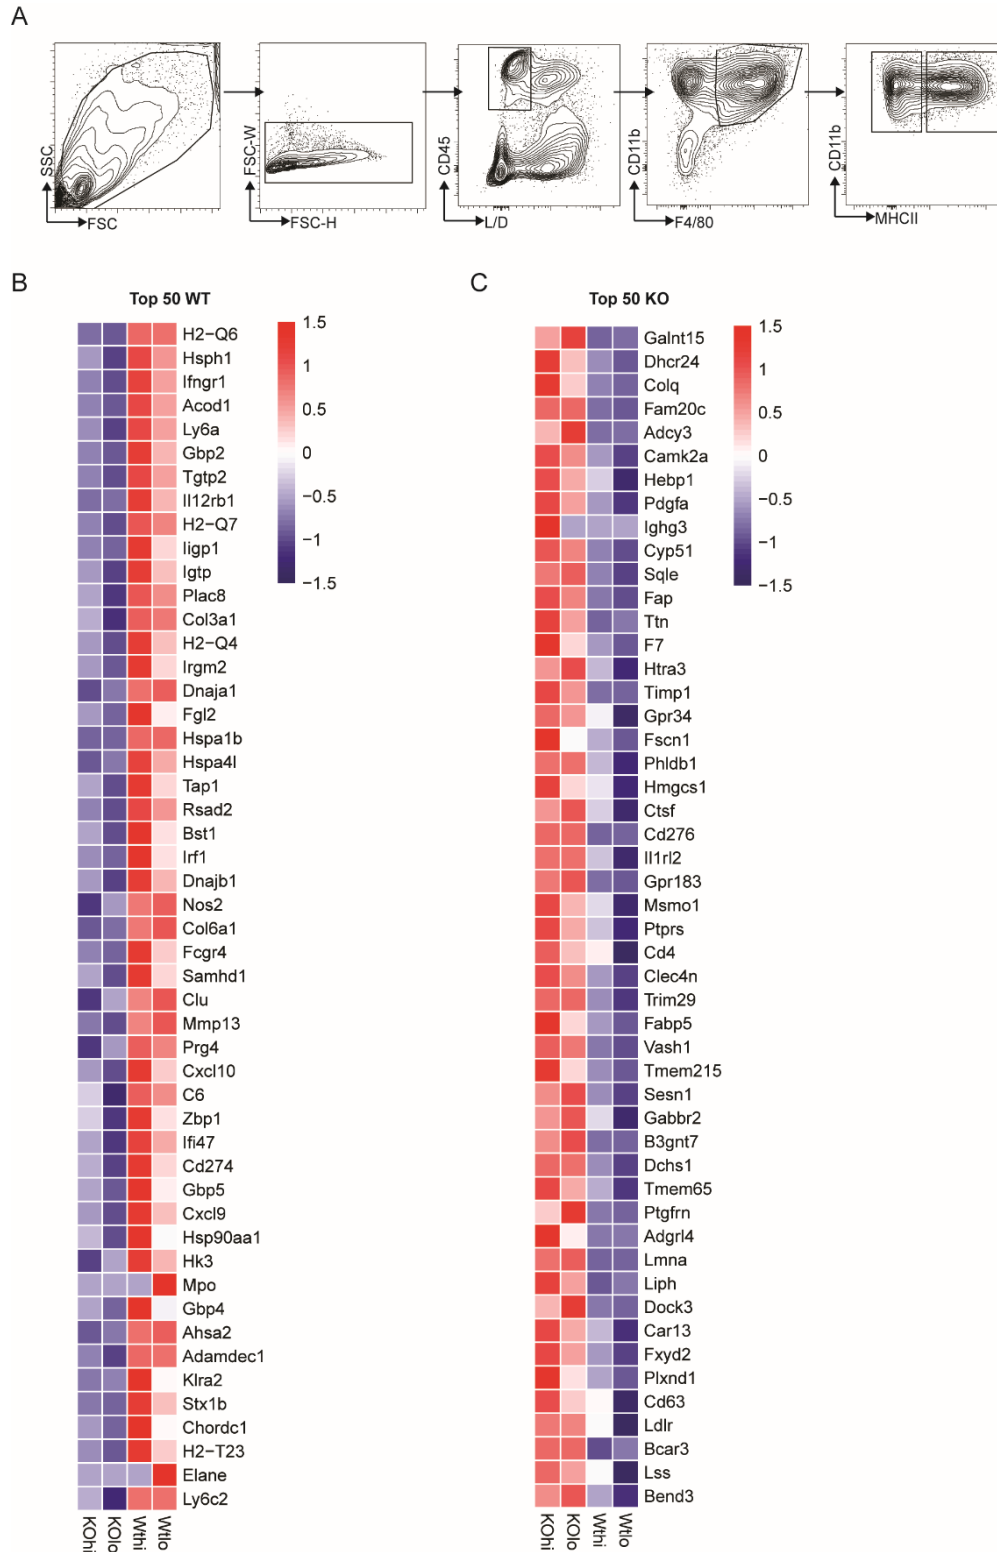

**Supplemental Figure 11. Bulk RNA sequencing of TAMs from *Ifngr1*<sup>-/-</sup> and WT mice. Related to Figure 6H-I. A) FACS sorting strategy for isolation of MHCII<sup>hi</sup> and MHCII<sup>lo</sup> TAMs from 4 pooled WT and 4 pooled IFN $\gamma$ R KO mice on 14 days post tumor implantation. B) Heat map of top 50 differentially expressed genes for each macrophage population.**

## Supplemental Figure 12

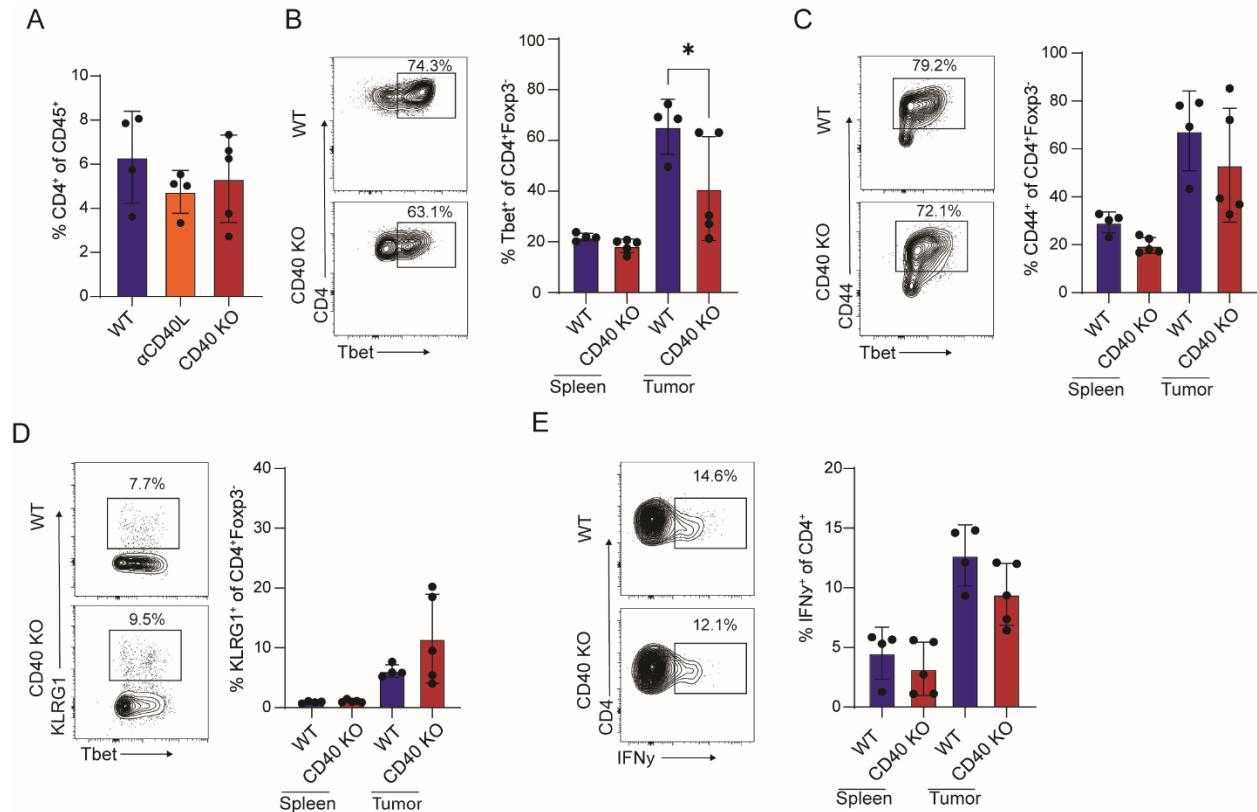

### Supplemental Figure 12. Impact of CD40 deletion or CD40L blockade on T cell phenotype. Related to Figure 6J-M.

**A)** Proportion of CD4<sup>+</sup> T cells among intratumoral CD45<sup>+</sup> immune cells from tumors of Day 7 WT, CD40 KO and CD40L treated mice. Each dot is an independent mouse. Data are mean ± S.E.M. n=4-5 mice per group.

**B)** Representative plots and proportion of CD4<sup>+</sup>Foxp3<sup>-</sup> T cells that express T-bet from mice in A. Each dot is an independent mouse. Data are mean ± S.E.M. n=4-5 mice per group. \**p*<0.05, Student's t-test for each tissue.

**C)** Representative plots and proportion of CD4<sup>+</sup>Foxp3<sup>-</sup> T cells that express CD44 from mice in A. Each dot is an independent mouse. Data are mean ± S.E.M. n=4-5 mice per group.

**D)** Representative plots and proportion of CD4<sup>+</sup>Foxp3<sup>-</sup> T cells that express KlrG1 from mice in A. Each dot is an independent mouse. Data are mean ± S.E.M. n=4-5 mice per group.

**E)** Representative plots and proportion of CD4<sup>+</sup> T cells that are producing IFN $\gamma$  following PMA/Ionomycin treatment. Each dot is an independent mouse. Data are mean ± S.E.M. n=4-5 mice per group

## Supplemental Figure 13

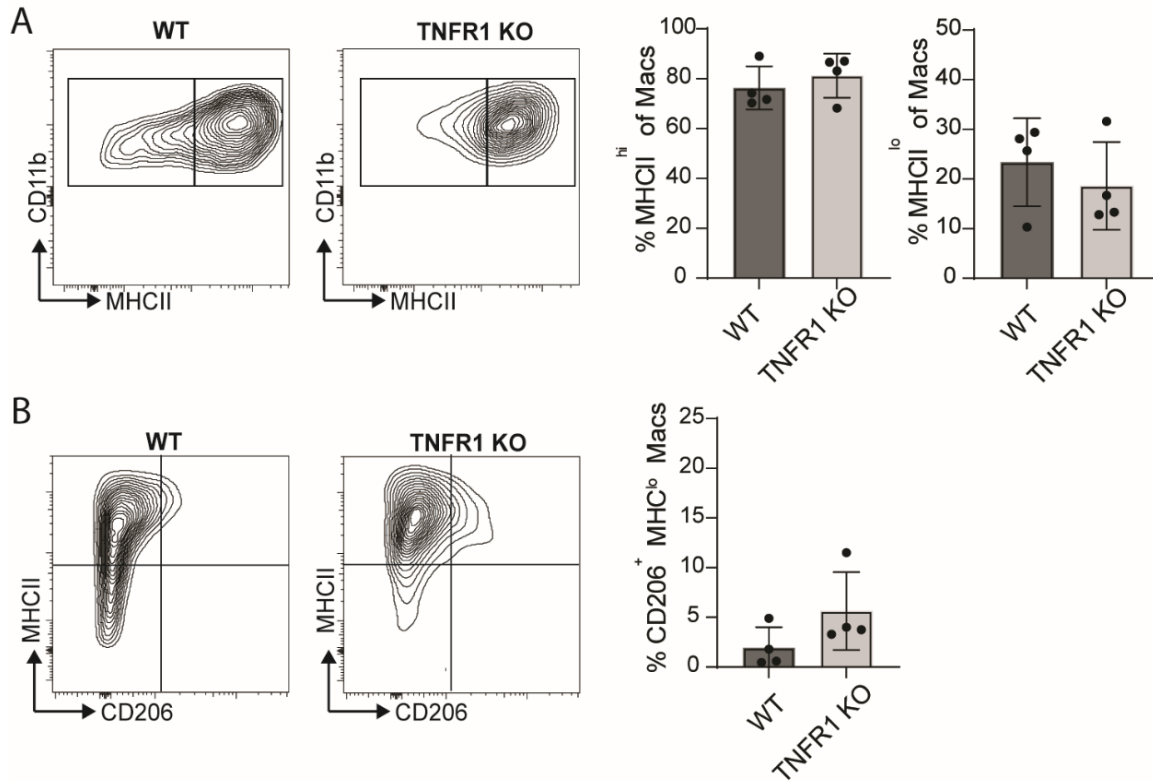

### Supplemental Figure 13. Impact of host cell *Tnfr1* deletion on macrophage phenotype. Related to Figure 6.

**A)** MHCII<sup>hi</sup> and MHCII<sup>lo</sup> macrophage frequency from tumors isolated from WT and *Tnfr1*<sup>-/-</sup> mice 7 days after implantation (n=4 mice per group). Populations are gated on CD64<sup>+</sup> F4/80<sup>+</sup> cells. Each dot is an independent mouse. Data are mean  $\pm$  S.E.M.

**B)** MHCII<sup>lo</sup> CD206<sup>+</sup> macrophage frequency in tumors from WT and *Tnfr1*<sup>-/-</sup> mice in A. Populations are gated on CD64<sup>+</sup> F4/80<sup>+</sup> cells. Each dot is an independent mouse. Data are mean  $\pm$  S.E.M.

## Supplemental Figure 14

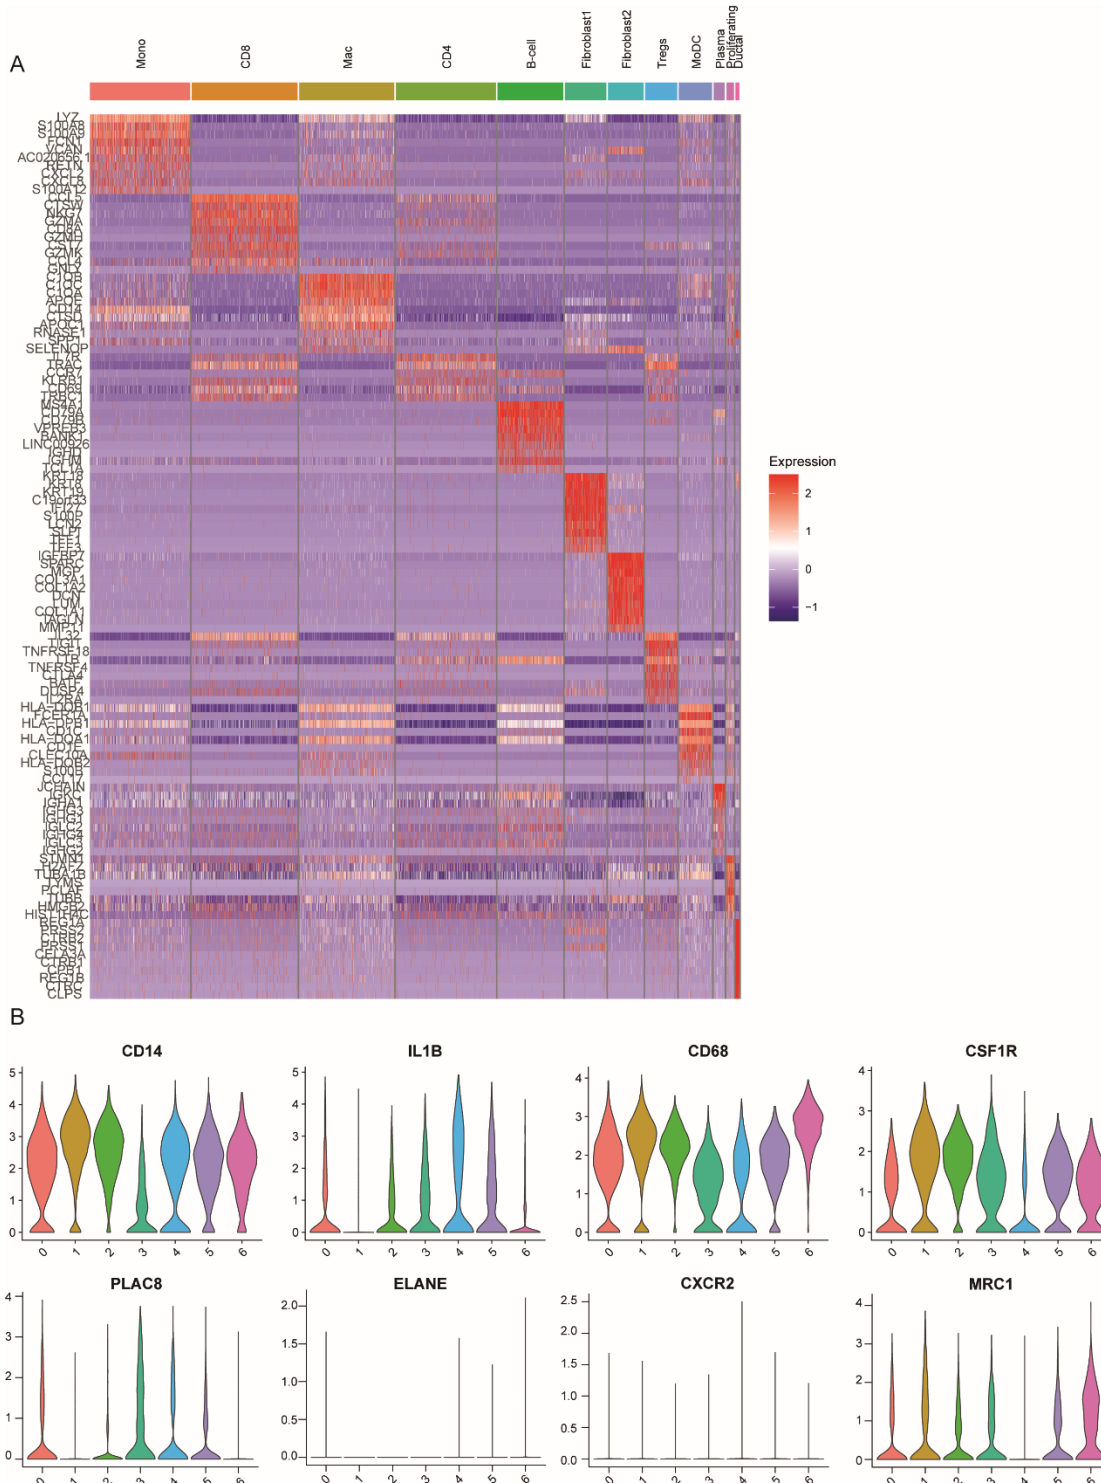

**Supplemental Figure 14. Human PDA scRNAseq analysis. Related to Figure 7.**

**A)** Heatmap of top differentially expressed genes from 6 resected human PDAs from Elyada *et al.* Cell populations were clustered in the UMAP space and named based off top differentially expressed genes

**B)** Violin plots of selected cluster defining genes from A.
